# Supplementary material for: Development and Verification of a Digital Twin Patient Model to Predict Specific Treatment Response During the First 24 Hours of Sepsis
Source: PubMed Central journal article supplement — Crit Care Explor. 2020 Nov 16;2(11):e0249. doi: 10.1097/CCE.0000000000000249 (PMC7671877; doi:10.1097/cce.0000000000000249), 2020-11-16
Supplement: cc9-2-e0249-s002.pdf [file cc9-2-e0249-s002.pdf]

# Data Entry: Septic shock

## Single case data entry

All values set to default. Change only what is different from default.

## Creating A Baseline State similar to Real Patient

**Present illness**

|              |          |                  |         |
|--------------|----------|------------------|---------|
| PatientID    | 12345678 | LivesAtHome      | No      |
| Timepoint    | HR2      | Employed         | No      |
| Gender       | Male     | FuncStateRankin  | Indeper |
| LOS          |          | CognitiveState   | Normal  |
| Height       |          | CarePreference   | Full    |
| Weight       |          | MetastaticCancer | No      |
| Smoking      | Never    | Chr.LiverDisease | No      |
| AlcoholUse   | Never    | Chr.LungDisease  | No      |
| Chr.HeartDis | No       | Diabetes         | No      |
|              |          | Chr.KdnDisease   | No      |

**Vitals**

|        |        |
|--------|--------|
| HR     | Normal |
| MAP    | RedLow |
| SBP    | Yellow |
| DBP    | Red    |
| Rhythm | NSR    |

**Imaging(CT, CXR, US)**

|             |    |
|-------------|----|
| ICH         | No |
| SAH         | No |
| Ischemia    | No |
| Brain Edema | No |

**Other**

|         |          |
|---------|----------|
| Age     |          |
| Echo    |          |
| CO      | Normal   |
| LV      | Moderate |
| RV      | Normal   |
| Tampnd  | Normal   |
| IVC     | Normal   |
| Lactate | Y        |
| RR      | Normal   |
| ph      | Normal   |
| PaO2    | Normal   |
| PaCO2   | Normal   |
| HCO3    | Normal   |
| FIO2    | Normal   |
| SpO2    | Normal   |
| Cough   | Normal   |
| Wheeze  | Normal   |
| Airway  | Normal   |
| FiO2    | Normal   |
| SpO2    | Normal   |
| Cough   | Normal   |
| Wheeze  | Normal   |
| Airway  | Normal   |

**CXR**

|             |         |
|-------------|---------|
| PneumoTX    | Not pre |
| Pulm Edema  | Not pre |
| Efussion    | Not pre |
| Atelectasis | Not pre |
| Pneumonia   | Not pre |

**Electrolytes**

|               |         |
|---------------|---------|
| Na            | Normal  |
| K             | Normal  |
| Cl            | Normal  |
| Mg            | Normal  |
| Ca            | Normal  |
| Hydronephrosi | Not pre |
| Anion Gap     | yh      |
| Cr            | Normal  |
| BUN           | Red     |
| Urine(m/h)    | Normal  |
| Fluid Balance | Normal  |
| Weight Change | Normal  |

**Glucose**

|          |         |
|----------|---------|
| Glucose  | Normal  |
| Protein  | Normal  |
| Albumin  | Normal  |
| Lipase   | Normal  |
| Pain     | Not pre |
| Bleeding | Not pre |

**Bilirubin**

|            |         |
|------------|---------|
| Bilirubin  | yh      |
| AST        | yh      |
| ALT        | Yellow  |
| ALP        | Normal  |
| Ammonia    | Normal  |
| Distension | Not pre |

**CT Body**

|               |         |
|---------------|---------|
| PE            | Not pre |
| Perf          | Not pre |
| Abscess       | Not pre |
| Ascites       | Not pre |
| Cholecystitis | Present |

**Other**

|            |         |
|------------|---------|
| Hgb        | Normal  |
| Hct        | Normal  |
| Platelets  | Normal  |
| INR        | Normal  |
| PT         | Normal  |
| PTT        | Normal  |
| Fibrinogen | Normal  |
| Temp       | Normal  |
| WBC        | yh      |
| CRP        | yh1     |
| Culture    | Not pre |
| Edema      | Not pre |
| Skin       | Not pre |
| Rash       | Not pre |
| Wound      | Not pre |
| Bleeding   | Not pre |
| Mottlig    | Not pre |

**Buttons**

Save changes
