# Supplementary material for: Development and Verification of a Digital Twin Patient Model to Predict Specific Treatment Response During the First 24 Hours of Sepsis
Source: PubMed Central journal article supplement — Crit Care Explor. 2020 Nov 16;2(11):e0249. doi: 10.1097/CCE.0000000000000249 (PMC7671877; doi:10.1097/cce.0000000000000249), 2020-11-16
Supplement: cc9-2-e0249-s003.pdf [file cc9-2-e0249-s003.pdf]

# Digital Twin (Virtual Patient)

Smartli Main CPOE Data entry My Account

New Simulation

Next step

## Admission

Simulation #

|                                                                                                      | Physical exam | POCUS                 | Labs                | Other tests                    | Interventions                                                                         |
|------------------------------------------------------------------------------------------------------|---------------|-----------------------|---------------------|--------------------------------|---------------------------------------------------------------------------------------|
| <b>NEURO</b><br>    | GCS           | 15                    |                     | <u>CT Head</u>                 |    |
|                                                                                                      | Pain          | 3                     |                     | ICH <input type="radio"/>      |                                                                                       |
|                                                                                                      | Delirium      | n/a                   |                     | SAH <input type="radio"/>      |                                                                                       |
|                                                                                                      | Seizure       | No                    |                     | Ischemia <input type="radio"/> |                                                                                       |
|                                                                                                      | Focal Deficit | No                    |                     | Edema <input type="radio"/>    |                                                                                       |
| <b>CARDIO</b><br>   | HR            | 91 LV                 | <b>Mild</b> Lactate | <b>3.2</b> <u>CVP/PAC</u>      |   |
|                                                                                                      | MAP           | <b>47</b> RV          | Normal ScVO2        | 77 PAP Normal                  |                                                                                       |
|                                                                                                      | Rhythm        | NSR IVC               | Normal              | PCPW Normal                    |                                                                                       |
|                                                                                                      | Cap Refill    | Normal Efussion       | No                  | SVR normal                     |                                                                                       |
|                                                                                                      | Mottling      | No                    |                     | CVP Normal                     |                                                                                       |
|                                                                                                      |               |                       |                     | CO Normal                      |                                                                                       |
| <b>IMMUNO</b><br> | Temp 36.2     |                       | WBC <b>13.7</b>     | <u>CT</u>                      |  |
|                                                                                                      | Rash          | <input type="radio"/> | CRP                 | 4 Blood culture /              |                                                                                       |
|                                                                                                      | Wound         | <input type="radio"/> |                     | Other culture                  |                                                                                       |
|                                                                                                      | Edema         | <input type="radio"/> |                     | Abscess                        |                                                                                       |
|                                                                                                      |               |                       |                     | Other source                   |                                                                                       |
