# Supplementary material for: Development and Verification of a Digital Twin Patient Model to Predict Specific Treatment Response During the First 24 Hours of Sepsis
Source: PubMed Central journal article supplement — Crit Care Explor. 2020 Nov 16;2(11):e0249. doi: 10.1097/CCE.0000000000000249 (PMC7671877; doi:10.1097/cce.0000000000000249), 2020-11-16
Supplement: cc9-2-e0249-s005.pdf [file cc9-2-e0249-s005.pdf]

# Outcome (digital twin versus real patient)

Smartli Main CPOE Data entry My Account

New Simulation

Next step

30min

Simulation #

|                                                                                     | Physical exam | POCUS   | Labs         | Other tests | Interventions                                                                       |                                                                                       |        |
|-------------------------------------------------------------------------------------|---------------|---------|--------------|-------------|-------------------------------------------------------------------------------------|---------------------------------------------------------------------------------------|--------|
| <b>NEURO</b>                                                                        | GCS           | 15      |              | CT Head     |                                                                                     |                                                                                       |        |
|    | Pain          | 3       |              | ICH         |  |                                                                                       |        |
|                                                                                     | Delirium      | n/a     |              | SAH         |                                                                                     |                                                                                       |        |
|                                                                                     | Seizure       | No      |              | Ischemia    |                                                                                     |                                                                                       |        |
|                                                                                     | Focal Deficit | No      |              | Edema       |                                                                                     | No                                                                                    |        |
|                                                                                     |               |         |              |             |                                                                                     |                                                                                       |        |
| <b>CARDIO</b>                                                                       | Physical exam | POCUS   | Labs         | Other tests |                                                                                     |                                                                                       |        |
|    | HR            | 95 LV   | Mild Lactate | 3.4         | CVP/PAC                                                                             |   |        |
|                                                                                     | MAP           | 62 RV   | Normal ScVO2 | 77          | PAP                                                                                 |                                                                                       | Normal |
|                                                                                     | Rhythm        | NSR IVC | Normal       |             | PCPW                                                                                |                                                                                       | Normal |
|                                                                                     | Cap Refill    | Normal  | Efussion     | No          | SVR                                                                                 |                                                                                       | normal |
|                                                                                     | Mottling      | No      |              |             | CVP                                                                                 |                                                                                       | Normal |
|                                                                                     |               |         |              | CO          | Normal                                                                              |                                                                                       |        |
|                                                                                     |               |         |              |             |                                                                                     |                                                                                       |        |
| <b>IMMUNO</b>                                                                       | Physical exam | POCUS   | Labs         | Other tests |                                                                                     |                                                                                       |        |
|  | Temp          | 36.2    | WBC          | 13.2        | CT                                                                                  |  |        |
|                                                                                     | Rash          | o       | CRP          | 3           | Blood culture                                                                       |                                                                                       | /      |
|                                                                                     | Wound         | o       |              |             | Other culture                                                                       |                                                                                       |        |
|                                                                                     | Edema         | o       |              |             | Abscess                                                                             |                                                                                       |        |
|                                                                                     |               |         |              |             | Other source                                                                        |                                                                                       |        |

Secondary effect

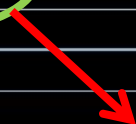

Primary effect

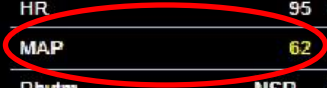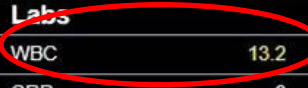

Primary effect
